# Supplementary material
Source: publisher figshare collection journal article supplement (https://gsajournals.figshare.com/ndownloader/files/12715895)
Supplement: Supplementary file 1 [file 12715895]

## Sheet: Table S1
Table S1: Plasmids used in this study
Name	Source
p426-SNR52p-gRNA.CAN1.Y-SUP4t	Addgene # 43803
pDYSCKO	This study
p415-Cas9	Addgene (#43804)
nCas9-Target-AID	Nishida et al, 2016
pDYSCKO-ADE1	This study
pDYSCKO-VPS35	This study
pDYSCKO-KANMX4_1	This study
pDYSCKO-KANMX4_2	This study
pDYSCKO-KANMX4_3	This study
pDYSCKO-POL1	This study
pDYSCKO-SDD3	This study
pDYSCKO-ILV3	This study
pDYSCKO-CDC24	This study
pDYSCKO-YMT1	This study
pDYSCKO-ARP9	This study
pDYSCKO-RSC3	This study
